# Supplementary material for: Electrostatic assembly of composite supercapacitor electrodes, triggered by charged dispersants
Source: Royal Society of Chemistry journal article supplement (doi:10.1039/c6ta07862a), 2016-01-01
Supplement: c6ta07862a1.pdf [file c6ta07862a1.pdf]

Supporting information

Electrostatic assembly of composite supercapacitor electrodes, triggered by charged dispersants

M.S.Ata, S.Ghosh and I.Zhitomirsky\*

Department of Materials Science and Engineering

McMaster University

1280 Main Street West

Hamilton, Ontario, Canada

L8S 4L7

\*E-mail: [zhitom@mcmaster.ca](mailto:zhitom@mcmaster.ca)

Phone: 1- (905) 525 – 9140

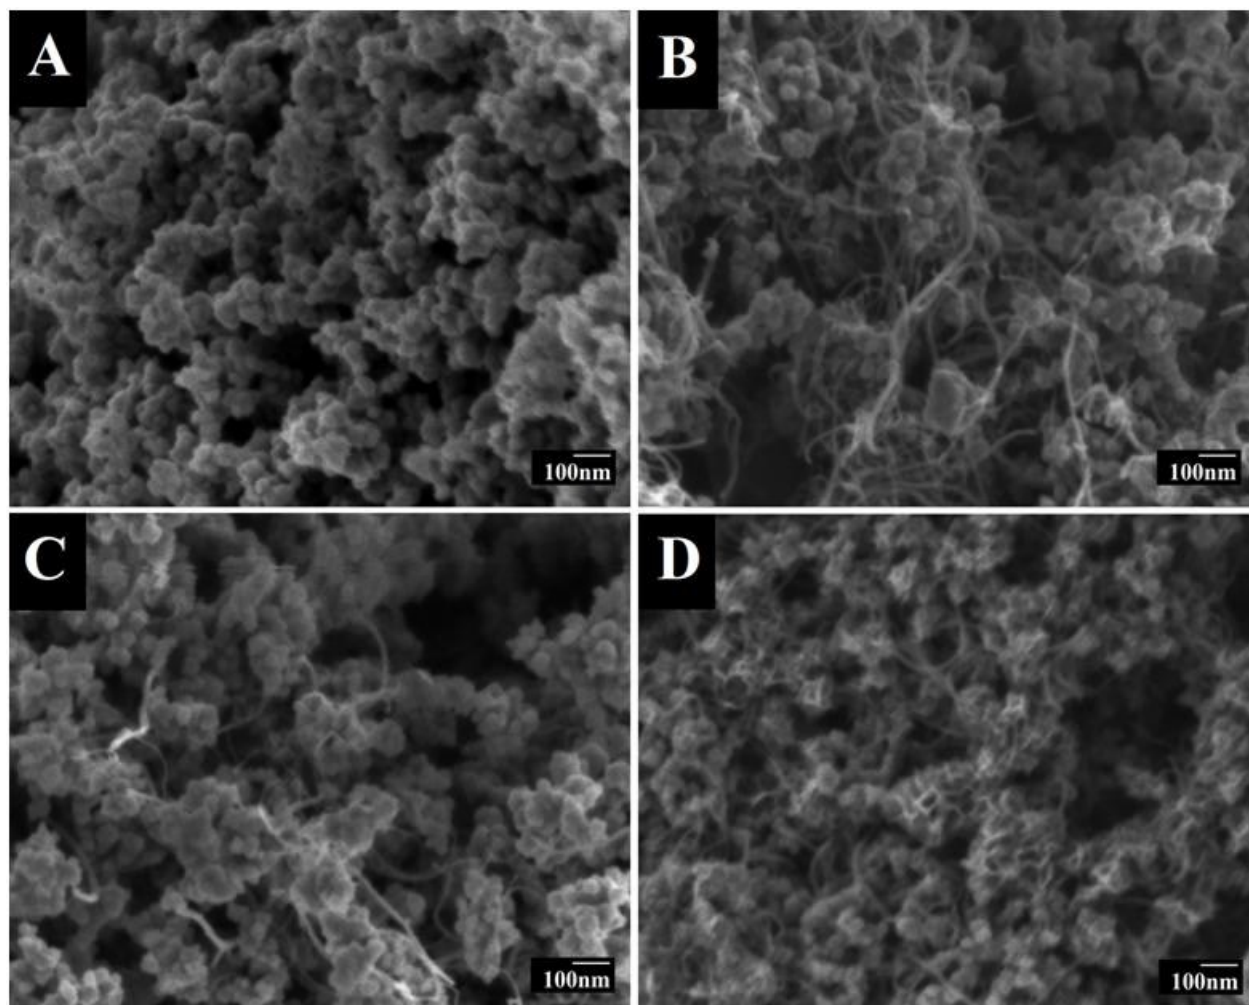

Figure S1. SEM images of (A) MnO<sub>2</sub> powder, (B) MnO<sub>2</sub>-MWCNT composite prepared without dispersants, (C) MnO<sub>2</sub>-MWCNT composite prepared using PHA and NB dispersants before electrochemical cycling, (D) MnO<sub>2</sub>-MWCNT composite prepared using PHA and NB dispersants after 1000 cycles.

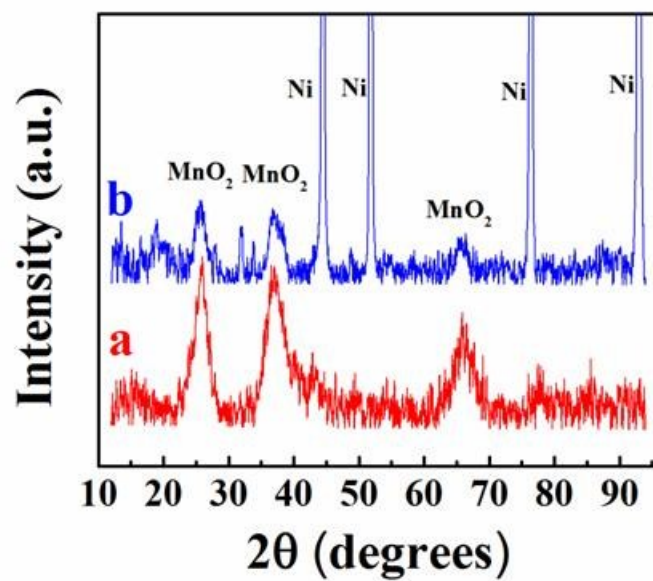

Figure S2. X-ray diffraction patterns of (a) as-prepared MnO<sub>2</sub> powder and (b) MnO<sub>2</sub>-MWCNT electrode, prepared using PHA and NB dispersants and Ni current collector, after 1000 cycles.

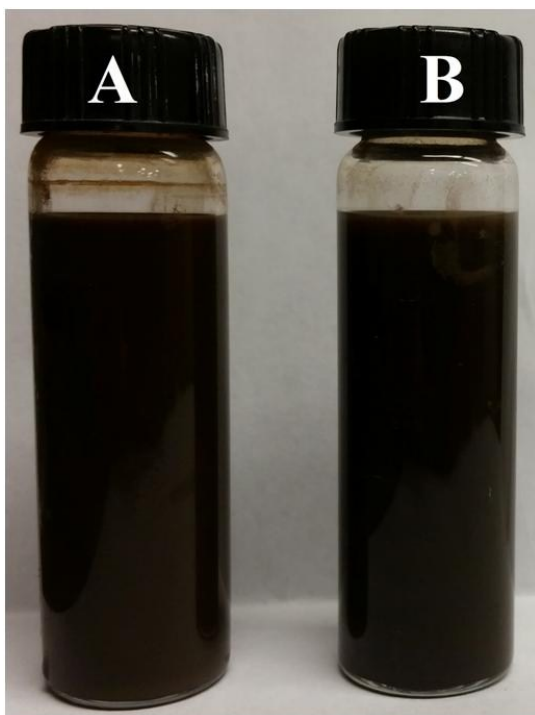

Figure S3.  $4 \text{ g L}^{-1}$   $\text{MnO}_2$  suspensions, containing  $0.2 \text{ g L}^{-1}$  of (A) PCA and (B) PHA 3 days after ultrasonication

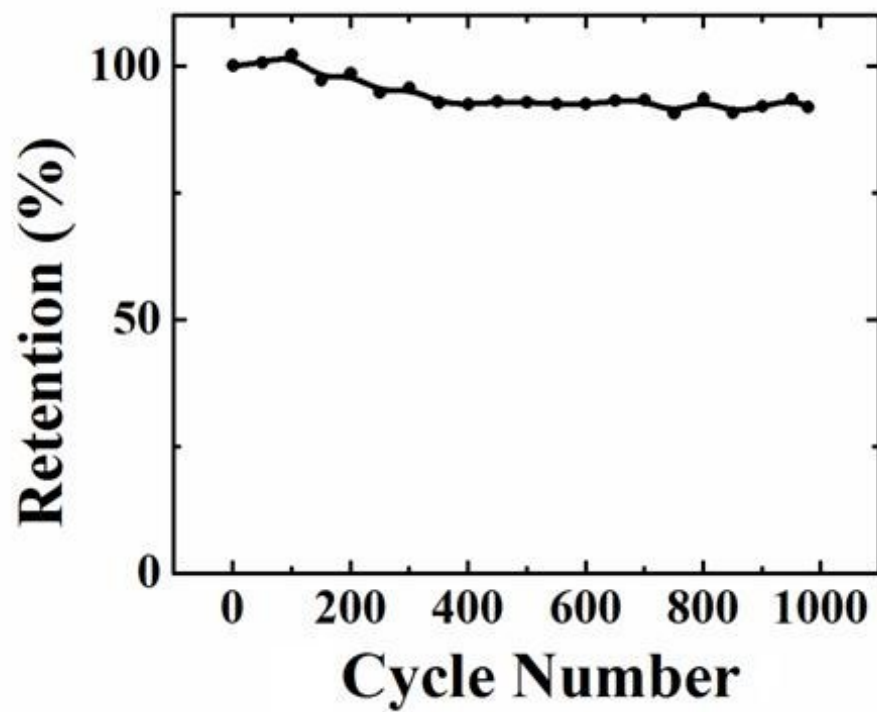

Figure S4. Capacitance retention versus cycle number at a scan rate of  $50 \text{ mV s}^{-1}$  for  $\text{MnO}_2$ -MWCNT electrodes, prepared using PHA and NB dispersants.
